# Supplementary material for: Double-blind randomized controlled trial of letrozole versus clomiphene citrate in subfertile women with polycystic ovarian syndrome
Source: PubMed Central journal article supplement — Hum Reprod. 2017 Jun 29;32(8):1631–8. doi: 10.1093/humrep/dex227 (PMC5850470; doi:10.1093/humrep/dex227), 2017-06-29
Supplement: dex227_suppl_table1.pdf [file dex227_suppl_table1.pdf]

**Supplementary Table S1** Outcomes for clomiphene citrate (CC) versus letrozole as a primary treatment—per-protocol analysis.

| Outcome                            | Letrozole     | CC            | Rate ratio (95% CI) | Absolute difference (95% CI) | P     |
|------------------------------------|---------------|---------------|---------------------|------------------------------|-------|
| Pregnancy rate                     | 47/75 (62.7%) | 32/74 (43.2%) | 1.4 (1.1, 2.0)      | 19% (3–34%)                  | 0.018 |
| Live birth rate                    | 37/75 (49.3%) | 26/74 (35.1%) | 1.4 (0.96, 2.1)     | 14% (–2 to 29%)              | 0.079 |
| Ovulation rate                     | 66/75 (88.0%) | 60/74 (81.1%) | 1.1 (0.9, 1.3)      | 7% (–5 to 19%)               | 0.173 |
| Pregnancies per ovulating patients | 47/66 (71.2%) | 32/60 (53.3%) | 1.3 (1.01, 1.8)     | 18% (1–30%)                  | 0.038 |
| Pregnancies—strata 1 (BMI <30)     | 35/51 (68.6%) | 23/49 (46.9%) | 1.5 (1.04, 2.1)     | 22% (2–39%)                  | 0.028 |
| Pregnancies—strata 2 (BMI = 30–35) | 12/24 (50.0%) | 9/25 (36.0%)  | 1.4 (0.7, 2.7)      | 14% (–13 to 38%)             | 0.322 |
