# Supplementary material for: Double-blind randomized controlled trial of letrozole versus clomiphene citrate in subfertile women with polycystic ovarian syndrome
Source: PubMed Central journal article supplement — Hum Reprod. 2017 Jun 29;32(8):1631–8. doi: 10.1093/humrep/dex227 (PMC5850470; doi:10.1093/humrep/dex227), 2017-06-29
Supplement: dex227_suppl_table2.pdf [file dex227_suppl_table2.pdf]

**Supplementary Table SII** Pregnancy rates for letrozole versus clomiphene citrate (CC) in subgroups of polycystic ovarian syndrome (PCOS) women based on clinical and/or biochemical hyperandrogenaemia (HA) and PCOS phenotype.

| PCOS subgroup                  | Pregnancy rates    |               | P     |
|--------------------------------|--------------------|---------------|-------|
|                                | Letrozole (N = 80) | CC (N = 79)   |       |
| Women with HA                  | 43/70 (61.4%)      | 28/62 (45.2%) | 0.080 |
| Women without HA               | 6/10 (60.0%)       | 6/17 (35.3%)  | 0.257 |
| Women with Full PCOS criteria* | 39/64 (60.9%)      | 26/55 (47.3%) | 0.145 |
| Women with Two PCOS criteria** | 10/16 (62.5%)      | 8/24 (33.3%)  | 0.106 |

\*Full PCOS criteria: oligo-/anovulation + hyperandrogenaemia + polycystic ovaries.

\*\*Two PCOS criteria: oligo-/anovulation + hyperandrogenaemia or polycystic ovaries.
